# Supplementary material for: Heterostructures between a tin-based intermetallic compound and a layered semiconductor for gas sensing
Source: Royal Society of Chemistry journal article supplement (doi:10.1039/d1cc00015b), 2021-01-01
Supplement: d1cc00015b1.pdf [file d1cc00015b1.pdf]

# Electronic Supplementary Information

## Heterostructures between tin-based intermetallic compound and layered semiconductor for gas sensing

Jusheng Bao,<sup>a</sup> Shaoyu Zeng,<sup>a</sup> Jie Dai,<sup>a</sup> Xiaoshan Wang,<sup>b</sup> Qiang Liu,<sup>a</sup> Hai Li,<sup>\*a</sup> Xiao  
Huang<sup>\*a</sup> and Wei Huang<sup>\*a,b</sup>

<sup>a</sup>Institute of Advanced Materials (IAM), Nanjing Tech University (NanjingTech), 30  
South Puzhu Road, Nanjing; 211816, China

<sup>b</sup>Frontiers Science Center for Flexible Electronics (FSCFE) & Shaanxi Institute of  
Flexible Electronics (SIFE), Northwestern Polytechnical University (NPU), 127 West  
Youyi Road, Xi'an 710072, China

## Experiment section

**Materials.** Thiourea ( $\text{CS}(\text{NH}_2)_2$ , 99%) and tin tetrachloride hydrate ( $\text{SnCl}_4 \cdot 5\text{H}_2\text{O}$ , 99.5%) were purchased from Sigma Aldrich. Ethanol ( $\text{C}_2\text{H}_5\text{OH}$ , 99.7%) was purchased from J&K chemical. Oleic acid (99.5%) n-octylamine (99.5%), tin dichloride hydrate ( $\text{SnCl}_2 \cdot 2\text{H}_2\text{O}$ , 99.5%), ascorbic acid (99.5%) and platinum acetylacetonate ( $\text{Pt}(\text{acac})_2$ , 99.5%) were purchased from Aladdin. The gaseous analyses ( $\text{C}_3\text{H}_6\text{O}$ ,  $\text{NH}_3$ ,  $\text{CH}_2\text{O}$ ,  $\text{C}_7\text{H}_8$  and  $\text{NO}_2$ ) which were diluted with air at concentrations of 1000 ppm were purchased from Nanjing Teqi Co., Ltd. All chemicals were used as received without further purification. The deionized (DI) water was purified using Milli-Q3 System (Millipore, France).

**Preparation of  $\text{SnS}_2$  nanoplates.** In a typical process, 0.25 mmol of  $\text{SnCl}_4 \cdot 5\text{H}_2\text{O}$  and 3.75 mmol of  $\text{CS}(\text{NH}_2)_2$  were dissolved in 19.45 mL DI water and stirred for 2 h to form a homogeneous solution. This solution was transferred to a 25 mL Teflon-lined stainless-steel autoclave, heated to 220 °C in an electrical oven and then maintained at this temperature for 12 h before being cooled down naturally to room temperature. The obtained product was centrifuged at 8000 rpm for 10 min, and the precipitate was washed with DI water for three times before further characterization.

**Preparation of  $\text{Pt}_3\text{Sn}$  nanoparticles.** In a typical process, 15 mg  $\text{SnCl}_2 \cdot 2\text{H}_2\text{O}$ , 35.6 mg ascorbic acid and 10 mg  $\text{Pt}(\text{acac})_2$  were dissolved in a mixture of 1 mL oleic acid and 10 mL n-octylamine to form a homogeneous solution. 4.95 mL of this mixed solution was transferred to a 5 mL Teflon-lined stainless-steel autoclave, heated to 180 °C in an electrical oven and then maintained at this temperature for 6 h before being cooled down naturally to room temperature. The obtained product was centrifuged and the precipitate was washed with ethanol and cyclohexane for three times before further characterization.

**Preparation of  $\text{SnS}_2/\text{Pt}_3\text{Sn}$  heterostructures.** Typically, 1 mL of the as-prepared  $\text{SnS}_2$  dispersion (with a concentration of 12 g/L) was centrifuged and washed sequentially

with a mixed solution of ethanol and oleic acid (volume ratio of 1:1) and then a mixed solution of ethanol, oleic acid and n-octylamine (volume ratio of 1:1:1), and finally redispersed in a mixture of 1 mL oleic acid and 10 mL n-octylamine together with 10 mg Pt(acac)<sub>2</sub>, 15 mg SnCl<sub>2</sub>·2H<sub>2</sub>O and 35.6 mg ascorbic acid to form a homogenous solution. 4.95 mL of this solution was then transferred to a 5 mL Teflon-lined stainless-steel autoclave, heated to 180 °C in an electrical oven and then maintained at this temperature for 6 h before being cooled down naturally to room temperature. The obtained product was centrifuged and the precipitate was washed with ethanol for three times before further characterization.

**Characterizations.** Transmission electron microscope (TEM, JEOL 2100plus, Japan), scanning electron microscope (SEM, JEOL JSM-7800F, Japan), and high-resolution transmission electron microscope (HRTEM, JEOL 2100F, Japan) coupled with energy dispersive X-ray (EDX) spectroscope were used to investigate the compositional, morphological and structural properties of the sample. X-ray diffraction (XRD, Rigaku Smart Lab, Japan) was performed using the CuK $\alpha$  radiation ( $\lambda = 1.54 \text{ \AA}$ ). Ultraviolet photoelectron spectrometer (UPS, PHI 5000 VersaProbe, Japan) measurement was carried out to study the electronic work function of metallic materials.

**Gas sensing tests.** Gas sensors were fabricated based on SnS<sub>2</sub> nanoplates, Pt<sub>3</sub>Sn NPs and SnS<sub>2</sub>/Pt<sub>3</sub>Sn heterostructures respectively for sensing various gases, including C<sub>3</sub>H<sub>6</sub>O, NH<sub>3</sub>, CH<sub>2</sub>O, C<sub>7</sub>H<sub>8</sub> and NO<sub>2</sub>. Typically, a drop of 100  $\mu$ L aqueous solution containing 10 mM as-prepared SnS<sub>2</sub>, Pt<sub>3</sub>Sn or SnS<sub>2</sub>/Pt<sub>3</sub>Sn was drop-casted onto an Au interdigitated electrode (with 0.1 mm spacing over a 2 $\times$ 1 cm<sup>2</sup> area, Changchun Mega Borui Technology Co., Ltd) and then dried in an oven at 60 °C. The gas sensing test was performed in an air/N<sub>2</sub>-tight chamber with electrical feedthroughs at room temperature (normally 25 °C). A constant current was applied to the sensor electrode, and the variation of the sensor resistance was monitored and recorded with the changes in the gas environment using a data acquisition system (34972A, Agilent) with a 20 channel multiplexer (34901, Agilent). A typical sensing measurement cycle consists of

three sequential steps: (1) an air or N<sub>2</sub> flow was introduced into the chamber to record a baseline resistance (R<sub>0</sub>); (2) a target gas, e.g., NO<sub>2</sub>, balanced in air was introduced, and the concentration increased with progressive cycles; and (3) after a certain time of exposure, the resistance of the sensor was recorded as R<sub>a</sub>, and the target gas was then replaced by air to allow the resistance of the sensor to return to R<sub>0</sub>. All gas flows were set at 500 sccm, precisely controlled by using mass-flow controllers. The sensing performance of Pt<sub>3</sub>Sn NPs and Pt<sub>3</sub>Sn/SnS<sub>2</sub> heterostructures were measured in air to demonstrate their potential for practical use. However, because SnS<sub>2</sub> nanoplates showed very poor conductivity in air whose resistance was beyond our measurement range, gas sensing for SnS<sub>2</sub> was only measured in N<sub>2</sub>.

**DFT calculations.** First-principles calculations based on density functional theory (DFT) were performed with the Cambridge Serial Total Energy Package (CASTEP) in Materials Studio (Version 8.0) of Accelrys Inc.<sup>1</sup> Generalized Gradient Approximation (GGA) of the Perdew–Burke–Ernzerhof (PBE) method was used in the approximation of the exchange–correlation part.<sup>2,3</sup> An ultrasoft pseudopotential was applied and the cut-off energy was set to 300 eV. The Brillouinzone k-point sampling was performed in a 3 × 4 × 1 Monkhorst–Pack scheme. The convergence tolerance criteria for self-consistent field, energy, maximum force, maximum stress, and maximum displacement were set to 2.0 × 10<sup>-6</sup> eV/atom, 2.0 × 10<sup>-5</sup> eV/atom, 0.05 eV/Å, 0.1 GPa and 0.002 Å. To modeling NO<sub>2</sub> adsorption on (001)SnS<sub>2</sub>, (100)Pt<sub>3</sub>Sn, (110)Pt<sub>3</sub>Sn and (111)Pt<sub>3</sub>Sn layers, 3×3×2, 2×2×2, 2×2×2 and 2×2×2 supercells were used, respectively.

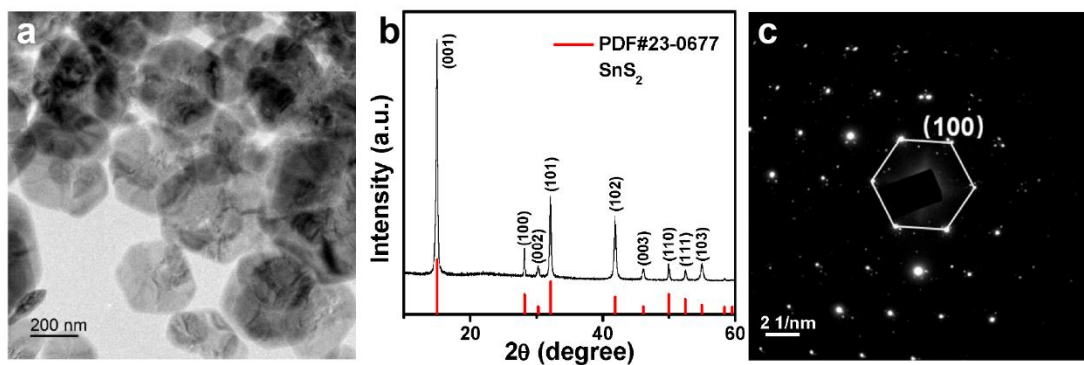

**Fig. S1** (a) TEM image, (b) XRD pattern and (c) SAED pattern of SnS<sub>2</sub> nanoplates.

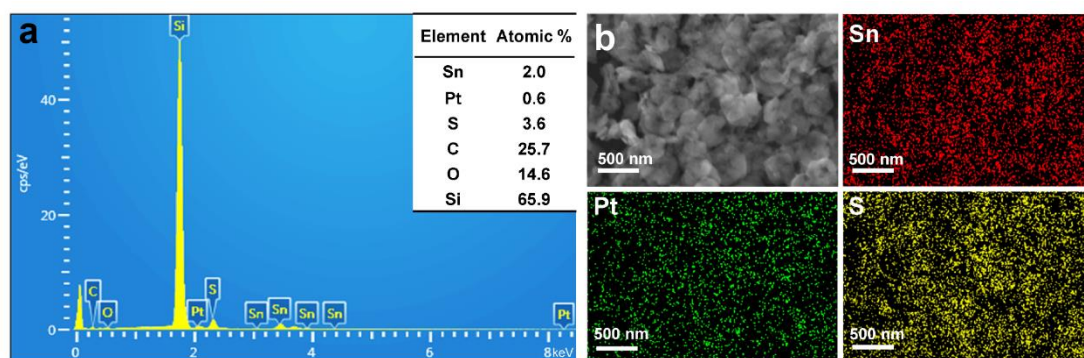

**Fig. S2** (a) EDS spectrum and (b) EDS mapping of as synthesized SnS<sub>2</sub>/Pt<sub>3</sub>Sn heterostructures.

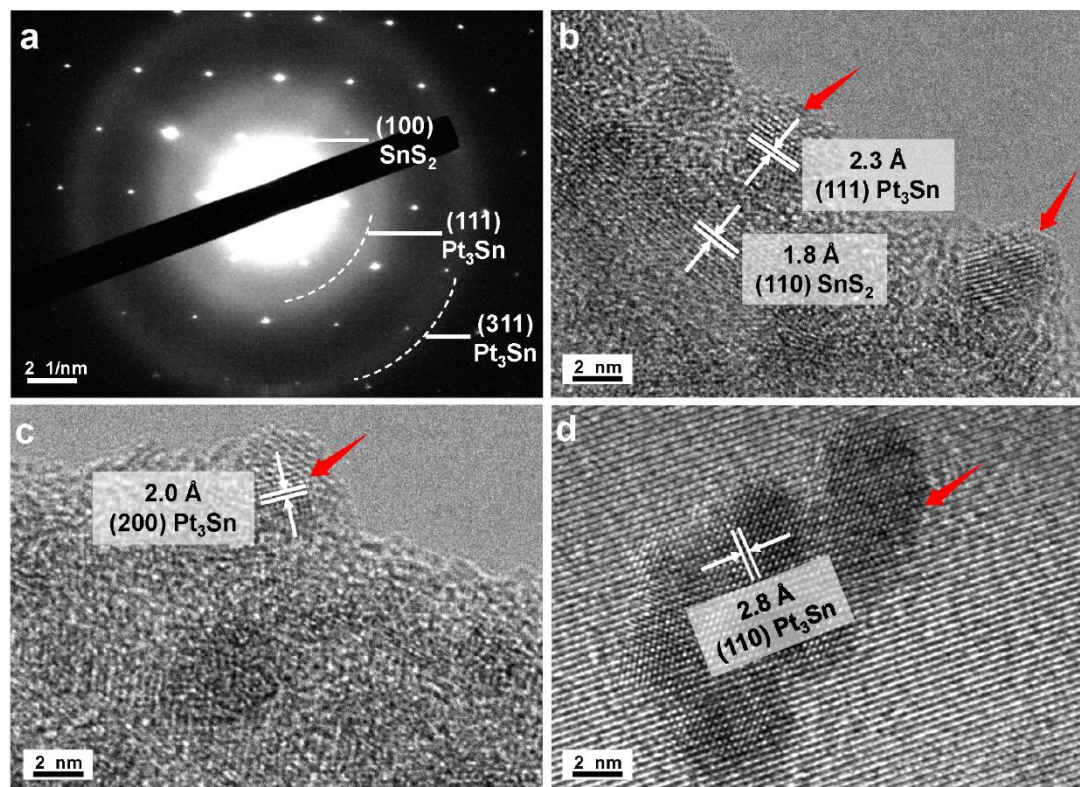

**Fig. S3** (a) SAED pattern of a SnS<sub>2</sub>/Pt<sub>3</sub>Sn heterostructure and (b-d) HRTEM images of SnS<sub>2</sub>/Pt<sub>3</sub>Sn

heterostructure, revealing some Pt<sub>3</sub>Sn particles with lattice fringes corresponding to (111), (200) and (110) planes. Arrows are used to point out Pt<sub>3</sub>Sn NPs.

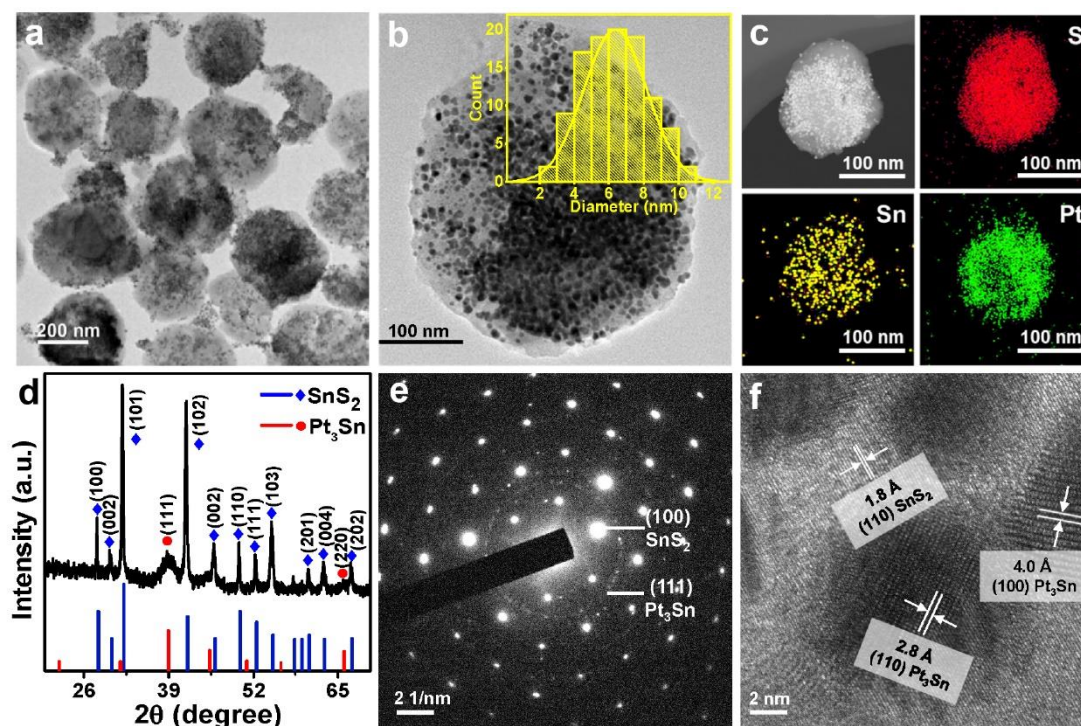

**Fig. S4** Morphology, composition and crystal structure analyses of SnS<sub>2</sub>/Pt<sub>3</sub>Sn heterostructures prepared when SnCl<sub>2</sub>·2H<sub>2</sub>O was not introduced to the growth solution of Pt<sub>3</sub>Sn. (a) Representative TEM image of SnS<sub>2</sub>/Pt<sub>3</sub>Sn heterostructures. (b) An enlarged TEM image of a SnS<sub>2</sub>/Pt<sub>3</sub>Sn heterostructure. Inset: size distribution of Pt<sub>3</sub>Sn NPs. (c) EDS mapping of a typical SnS<sub>2</sub>/Pt<sub>3</sub>Sn heterostructure. (d) XRD pattern of the SnS<sub>2</sub>/Pt<sub>3</sub>Sn heterostructures. (e) SAED pattern of a SnS<sub>2</sub>/Pt<sub>3</sub>Sn heterostructure along the [001] SnS<sub>2</sub> zone axis. (f) HRTEM image of a small area of a SnS<sub>2</sub>/Pt<sub>3</sub>Sn heterostructure.

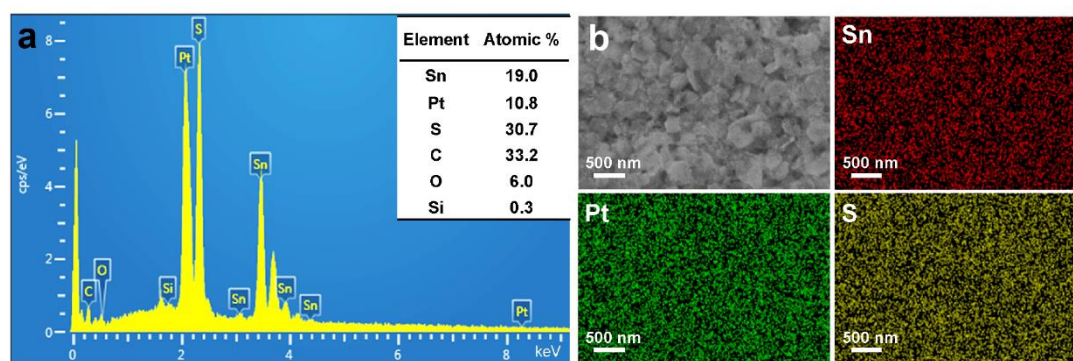

**Fig. S5** EDS analysis of the SnS<sub>2</sub>/Pt<sub>3</sub>Sn heterostructures when SnCl<sub>2</sub>·2H<sub>2</sub>O was not introduced to the growth solution of Pt<sub>3</sub>Sn. Based on the stoichiometric ratios of Pt<sub>3</sub>Sn (Pt:Sn = 3:1) and SnS<sub>2</sub> (Sn:S = 1:2), their content ratio in the heterostructure can be estimated as Pt<sub>3</sub>Sn : SnS<sub>2</sub> = 3.6:15.4 or

1:4.3.

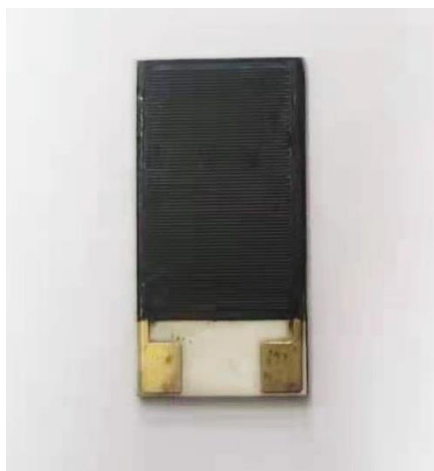

**Fig. S6** Photograph of an interdigitated electrode with deposited SnS<sub>2</sub>/Pt<sub>3</sub>Sn for gas sensing.

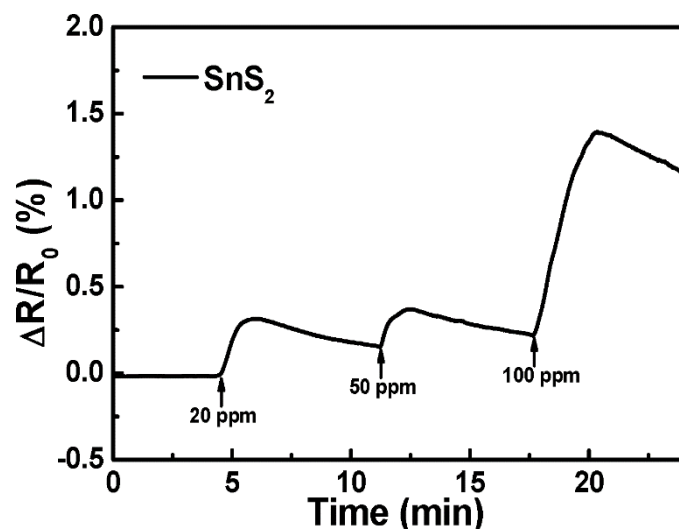

**Fig. S7** Dynamic sensing performance of a NO<sub>2</sub> sensor fabricated based on SnS<sub>2</sub> nanoplates.

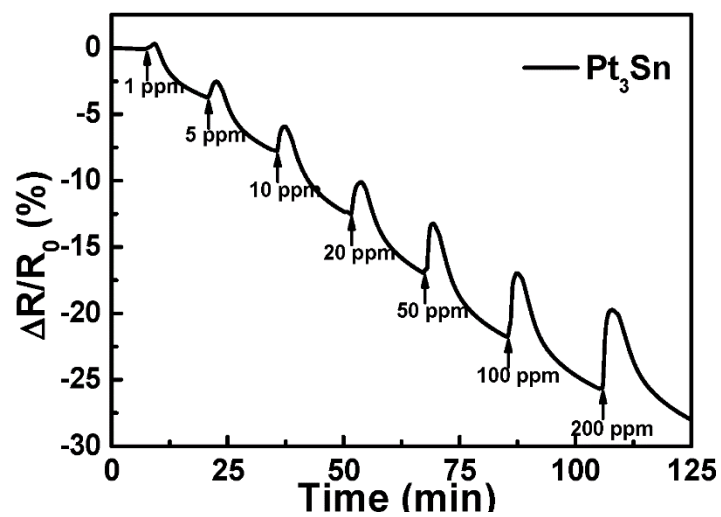

**Fig. S8** Dynamic sensing performance of a NO<sub>2</sub> sensor fabricated based on Pt<sub>3</sub>Sn NPs.

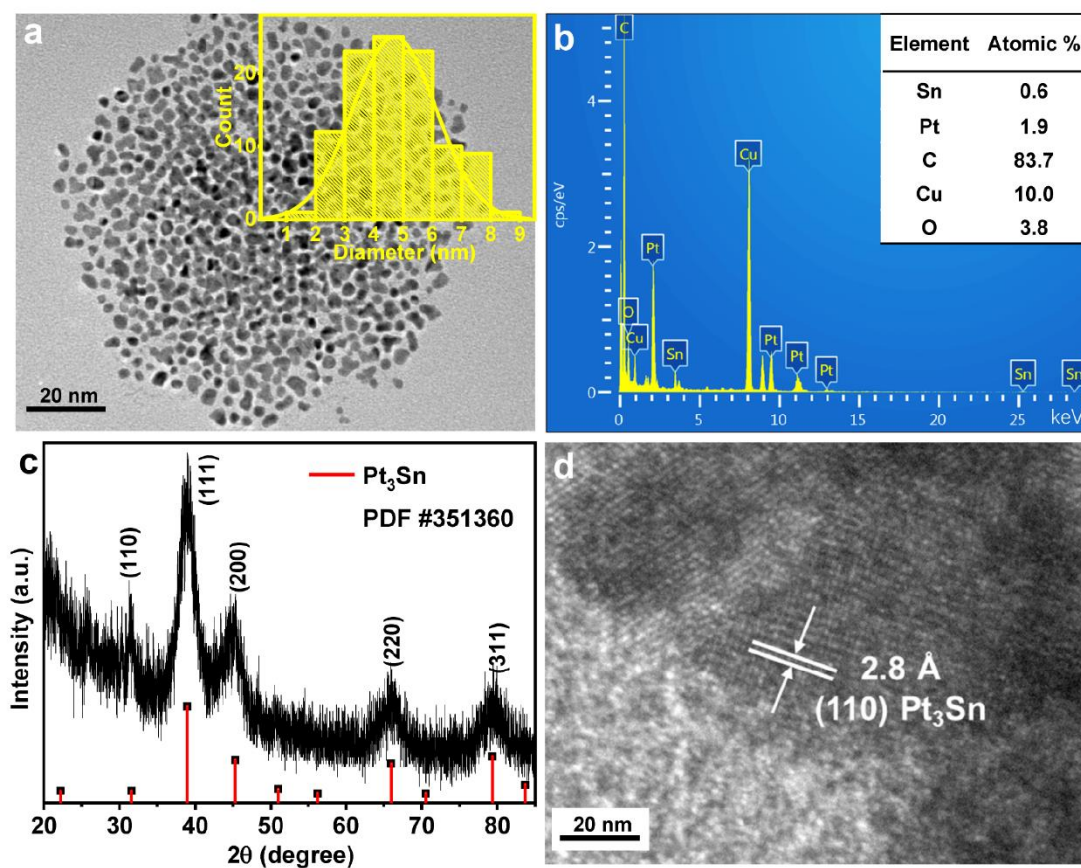

**Fig. S9** (a) TEM image, (b) EDS spectrum, (c) XRD pattern and (d) HRTEM image of Pt<sub>3</sub>Sn NPs. The TEM image shows that the NPs have an average diameter of ~4.8 nm. The EDS analysis result indicates that the atomic ratio of Pt and Sn is about 3:1. The XRD pattern of the NPs matches with the standard pattern for Pt<sub>3</sub>Sn (JCPDS NO.35-1360). The observed lattice spacing of 0.28 nm in the HRTEM image can be assigned to the (110) planes of Pt<sub>3</sub>Sn.

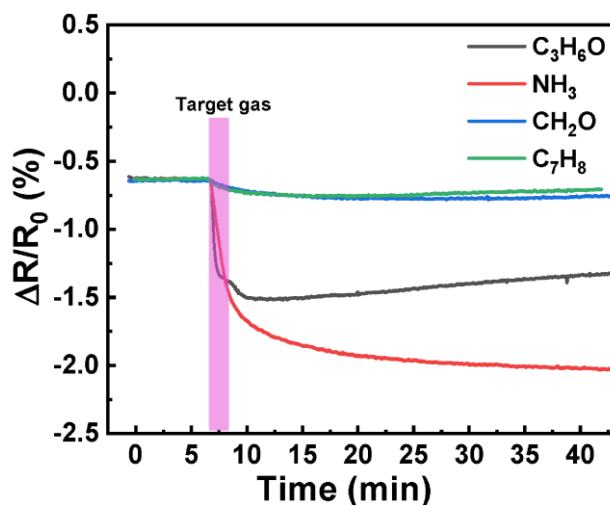



**Fig. S10** The response of SnS<sub>2</sub>/Pt<sub>3</sub>Sn based sensor to NO<sub>2</sub> and other several gas species such as C<sub>3</sub>H<sub>6</sub>O, NH<sub>3</sub>, CH<sub>2</sub>O, C<sub>7</sub>H<sub>8</sub>, NO<sub>2</sub> at a concentration of 50 ppm at room temperature (the target gas was introduced for 2 min).

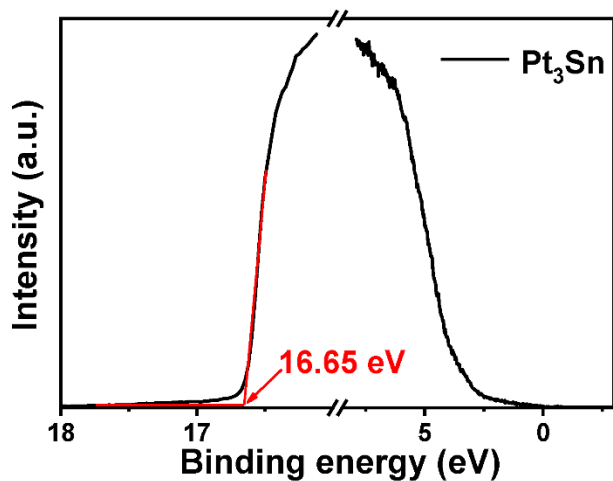

**Fig. S11** UPS analysis of the work function ( $\phi$ ) of Pt<sub>3</sub>Sn, which is determined as 4.55 eV.

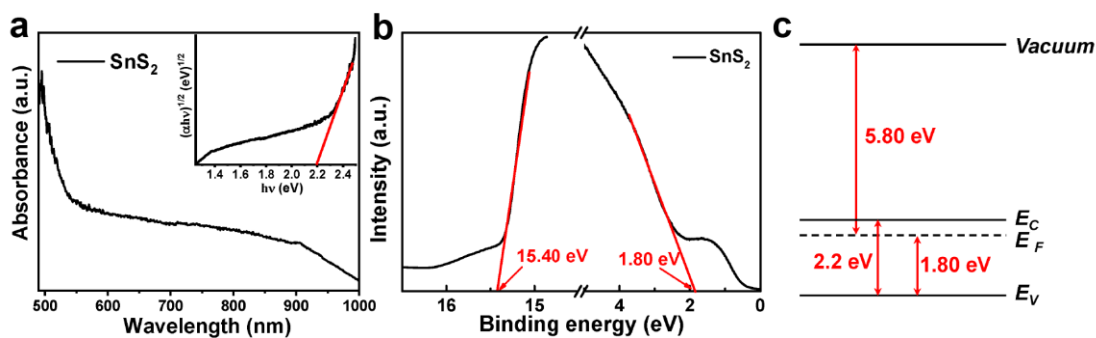

**Fig. S12** (a) UV-Vis absorption spectrum of SnS<sub>2</sub> nanoplates. (b) UPS analysis of SnS<sub>2</sub>, whose work function ( $\phi$ ) is estimated as 5.80 eV. (c) The diagrams of SnS<sub>2</sub> conduction and valence band position.

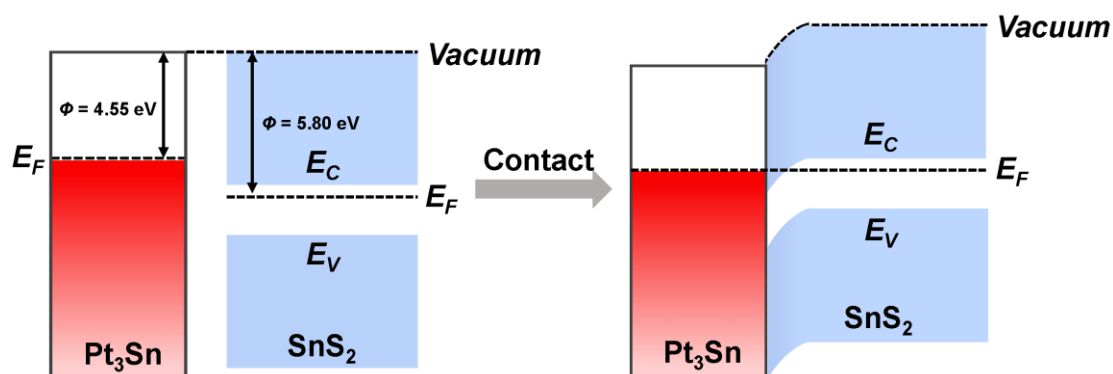

**Fig. S13** Schematic illustration showing the band diagram of SnS<sub>2</sub>/Pt<sub>3</sub>Sn before and after contact at equilibrium.

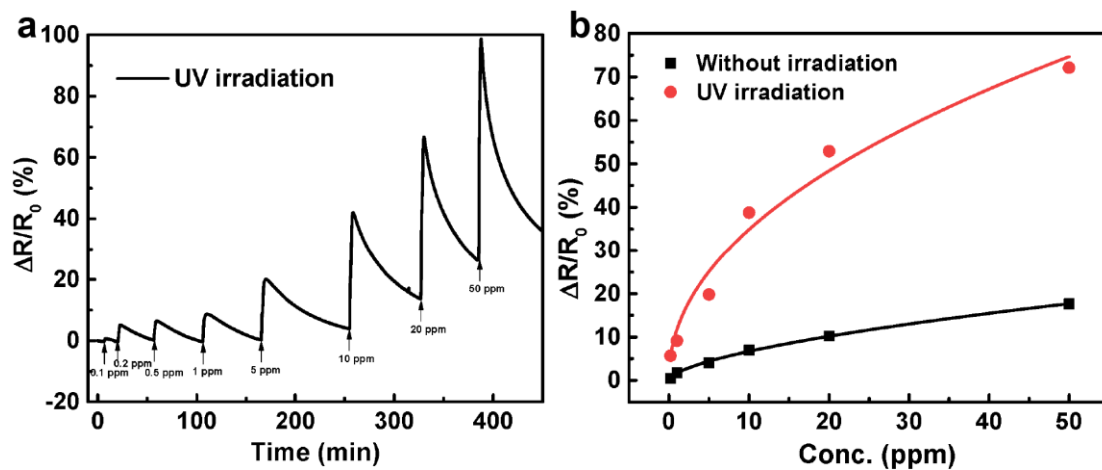

**Fig. S14** (a) Dynamic sensing performance of a  $\text{NO}_2$  sensor fabricated based on  $\text{SnS}_2/\text{Pt}_3\text{Sn}$  heterostructure under UV irradiation (365 nm). (b) Change of resistance of  $\text{SnS}_2/\text{Pt}_3\text{Sn}$  based sensors under UV irradiation and without UV irradiation.

**Table S1** Comparison of the room temperature sensing performance of the SnS<sub>2</sub>/Pt<sub>3</sub>Sn heterostructures and some other previous reports.

| Materials                               | Operating conditions | Limit of detection (ppb) | Response ( $\Delta R/R_0$ )                                                | Ref.             |
|-----------------------------------------|----------------------|--------------------------|----------------------------------------------------------------------------|------------------|
| <b>SnS<sub>2</sub>/Pt<sub>3</sub>Sn</b> | <b>RT</b>            | <b>25</b>                | <b>0.4% @ 0.2 ppm<br/>0.8% @ 0.5 ppm<br/>1.8% @ 1 ppm<br/>4.1% @ 5 ppm</b> | <b>This work</b> |
| MoS <sub>2</sub> /SnO <sub>2</sub>      | RT                   | n.a.                     | 0.6% @ 0.5 ppm                                                             | 4                |
| g-C <sub>3</sub> N <sub>4</sub> /GaN    | RT and 392 nm light  | n.a.                     | 17.0% @ 5 ppm                                                              | 5                |
| NbS <sub>2</sub>                        | RT                   | 241                      | 1.53% @ 0.5 ppm                                                            | 6                |
| MoS <sub>2</sub>                        | RT                   | n.a.                     | 0.2% @ 0.1 ppm                                                             | 7                |
| WS <sub>2</sub>                         | RT                   | n.a.                     | 10.6% @ 0.8 ppm                                                            | 8                |
| Pt-ZnO/PRGO                             | RT                   | n.a.                     | 43.8% @ 5 ppm                                                              | 9                |
| CuO/rGO                                 | RT                   | n.a.                     | 400.8% @ 5 ppm                                                             | 10               |
| Cu <sub>2</sub> O/rGO                   | 60 °C                | n.a.                     | 4.8% @ 0.02 ppm                                                            | 11               |
| MoS <sub>2</sub> /graphene              | 120 °C               | n.a.                     | 29.8% @ 1 ppm                                                              | 12               |

n.a. means not available.

## References

- 1 M. D. Segall, P. J. D. Lindan, M. J. Probert, C. J. Pickard, P. J. Hasnip, S. J. Clark and M. C. Payne, *J. Phys.: Condens. Matter*, 2002, **14**, 2717-2744.
- 2 J. P. Perdew, K. Burke and M. Ernzerhof, *Phys. Rev. Lett.*, 1996, **77**, 3865-3868.
- 3 J. A. White and D. M. Bird, *Phys. Rev. B*, 1994, **50**, 4954-4957.
- 4 S. Cui, Z. Wen, X. Huang, J. Chang and J. Chen, *Small*, 2015, **11**, 2305-2313.
- 5 M. Reddeppa, N. T. KimPhung, G. Murali, K. S. Pasupuleti, B.-G. Park, I. In and M.-D. Kim, *Sens. Actuators B Chem.*, 2021, **329**, 129175.
- 6 Y. Kim, K. C. Kwon, S. Kang, C. Kim, T. H. Kim, S.-P. Hong, S. Y. Park, J. M. Suh, M.-J. Choi, S. Han and H. W. Jang, *ACS Sens.*, 2019, **4**, 2395-2402.
- 7 S.-Y. Cho, S. J. Kim, Y. Lee, J.-S. Kim, W.-B. Jung, H.-W. Yoo, J. Kim and H.-T. Jung, *ACS Nano*, 2015, **9**, 9314-9321.
- 8 A. Alagh, F. E. Annanouch, P. Umek, C. Bittencourt, A. Sierra-Castillo, E. Haye, J. F. Colomer and E. Llobet, *Sens. Actuators B Chem.*, 2021, **326**, 128813.
- 9 J.-Y. Kang, W.-T. Koo, J.-S. Jang, D.-H. Kim, Y. J. Jeong, R. Kim, J. Ahn, S.-J. Choi and I.-D. Kim, *Sens. Actuators B Chem.*, 2021, **331**, 129371.
- 10 H. Bai, H. Guo, J. Wang, Y. Dong, B. Liu, Z. Xie, F. Guo, D. Chen, R. Zhang and Y. Zheng, *Sens. Actuators B Chem.*, 2021, **337**, 129783.
- 11 Y. Zhou, G. Liu, X. Zhu and Y. Guo, *Ceram. Int.*, 2017, **43**, 8372-8377.
- 12 H. S. Hong, N. H. Phuong, N. T. Huong, N. H. Nam and N. T. Hue, *Appl. Surf. Sci.*, 2019, **492**, 449-454.
